# Supplementary material for: Impact of Nordic hamstring breaking point angle on football player performance
Source: PeerJ. 2025 Apr 23;13:e19275. doi: 10.7717/peerj.19275 (PMC12032959; doi:10.7717/peerj.19275)
Supplement: Supplemental Information 1 [file peerj-13-19275-s001.xlsm]

## Sheet: 09-09-2024 eded
Age	Height(m)	Bodymas	BMI	NHC	10Meter Sprint(sec)	20 Meter Sprint(sec)	30 Meter Sprint(sec)	CMJ(cm)	COD(sec)
17	1.8	66	20.37	29	1.59	2.93	4.11	37	4.96
17	1.8	63	18.44	29	1.63	2.97	4.19	39	4.89
17	1.72	61	20.62	29.3	1.75	3.01	3.95	46.39	5.02
17	1.7	64	19.72	32.5	1.62	2.99	4.12	38.54	4.53
17	1.75	66	21.55	33	1.65	2.91	4	39.7	5.06
17	1.82	76	22.94	33.1	1.75	2.94	3.85	46.39	5.02
17	1.82	76	22.94	34	1.64	2.99	4.09	43.27	5.14
17	1.75	60	19.59	37.1	1.61	3.09	4.07	44.24	5.01
17	1.9	74	24.93	37.5	1.62	2.94	4.05	36.54	4.5
17	1.82	75	22.64	37.6	1.68	2.92	4.34	38.17	5.12
17	1.79	76	23.72	37.6	1.69	2.97	4.24	38.17	5.02
17	1.79	62	19.35	38.5	1.62	3	4.14	34.15	5.11
17	1.85	77	22.5	38.5	1.81	3.11	4.12	36	5.09
18	1.66	64	23.23	39.5	1.62	2.92	4.11	34.57	5.06
18	1.66	64	23.23	40.8	1.7	3.17	4.15	37.55	5.01
17	1.78	67	21.15	40.8	1.7	3.16	4.15	37.55	5.01
17	1.8	68	20.99	41.2	1.66	2.98	4.37	39.25	5
18	1.75	64	20.9	41.21	1.79	3.1	4.09	36.22	5.63
17	1.72	64	21.63	41.21	1.79	3.1	4.09	36.22	5.63
17	1.8	75	23.15	41.5	1.71	3.02	4.26	36.9	4.86
16	1.85	69	20.16	42.5	1.81	3.11	4.12	36	5.09
16	1.8	67	20.68	42.5	1.79	3.19	4.31	42.1	5.29
17	1.79	76	23.72	43.1	1.72	3.08	4.39	35.65	5.58
17	1.73	62	20.72	43.5	1.76	3.14	4.39	33.75	5.39
17	1.65	60	22.04	44.2	1.71	3	4.1	31.25	5.31
17	1.75	65	21.22	44.2	1.71	3	4.2	36.25	5.51
17	1.8	75	23.15	45.1	1.78	3.09	4.09	33.9	5.67
16	1.76	63	20.34	45.1	1.68	3.09	4.09	36.8	5.67
17	1.73	75	25.06	45.1	1.88	3.12	4.29	39	5.22
17	1.69	65	22.76	45.1	1.88	3.12	4.19	39	5.22
17	1.85	77	22.5	45.3	1.85	3.18	4.62	31.64	5.22
17	1.85	77	22.5	45.8	1.72	3.11	4.29	39.04	5
16	1.79	64	19.97	46.7	1.77	3.02	4.25	36.29	4.93
16	1.7	62	20.07	46.7	1.79	3.08	4.35	38.29	4.93
16	1.8	74	22.84	46.7	1.74	3.01	4.27	38.73	5.48
16	1.8	74	22.84	47.8	1.77	3.07	4.27	38.25	5.62
17	1.75	61	19.92	47.9	1.82	3.19	4.34	32.15	5.42
17	1.73	63	21.05	48.28	1.72	3.11	4.27	33.98	5.56
18	1.83	72	24.93	48.28	1.72	3.08	4.35	33.98	5.56
18	1.9	74	24.93	48.5	1.79	3.21	4.29	38.25	5.6
17	1.7	60	20.76	49.3	1.78	3.24	4.32	31.64	5.22
16	1.72	61	20.62	49.6	1.84	3.12	4.59	34.04	5.09
16	1.72	61	20.62	49.6	1.74	3.12	4.59	37.04	5.09
17	1.78	62	17.99	50.6	1.76	3.13	4.48	32.77	6
18	1.81	67	20.45	50.6	1.76	3.12	4.48	32.77	6
18	1.81	67	20.45	52.02	1.89	3.14	4.55	33.07	6
16	1.83	66	19.71	52.02	1.89	3.18	4.55	33.07	6
16	1.83	66	19.71	54	1.82	3.15	4.07	34.44	5.27
17	1.69	63	17.86	54	1.81	3.17	4.07	34.44	5.27
17	1.82	70	21.13	55.3	1.79	3.19	4.27	37.95	5.39
17	1.8	70	21.6	55.7	1.74	3.18	4.39	33.26	5.22
17	1.7	66	22.84	55.7	1.82	3.18	4.52	33.26	5.5
16	1.76	64	20.66	55.7	1.77	3.18	4.52	33.26	5.5
17	1.8	75	23.15	55.7	1.76	3.09	4.22	42.54	5.32
16	1.71	63	19.49	55.7	1.71	3.15	4.45	42.54	5.91
16	1.71	64	19.49	56.7	1.74	3.07	4.27	38.73	5.64
16	1.73	66	22.05	57.8	1.92	3.13	4.52	38.25	5.62
16	1.73	66	22.05	59.6	1.89	3.07	4.31	35.7	5.23
